# Supplementary material for: Genomic epidemiology of Campylobacter fetus subsp. venerealis from Germany
Source: Front Vet Sci. 2023 Jan 19;9:1069062. doi: 10.3389/fvets.2022.1069062 (PMC9893283; doi:10.3389/fvets.2022.1069062)
Supplement: Supplementary Table S1 — Summary of Campylobacter fetus subsp. venerealis strains isolated from the federal states of Germany. The spatial and temporal distribution of these strains is depicted in Figure 1. [file Table_1.xlsx]

## Sheet: Table S1
		Table S1. Summary of Campylobacter fetus strains isolated from the federal states of Germany between 1985 and 2018. The spatial and temporal distribution of these strains is depicted in Figure 1
		n.	Strain ID	Collection year	Country	Federal state (Germany)	Isolation source	MLST Type	Subspecies (NGS)	C. fetus SNP Markers *	ISCfe1 (+/-)	Phylogenetic sublineage	Accession number	Publication
		1	BS210-02	2002	Germany	Baden-Wuerttemberg	Bull prepuce	4	cfv	T-T-C-T-A-C-A-C-C-A-G	+	BW	SRR21927905	This study
		2	BS212-02	2002	Germany	Baden-Wuerttemberg	Cow vaginae	4	cfv	T-T-C-T-A-C-A-C-C-A-G	+	BW	SRR21927904	This study
		3	BS38-03	2003	Germany	Baden-Wuerttemberg	Bull prepuce	4	cfv	T-T-C-T-A-C-A-C-C-A-G	+	BW	SRR21927893	This study
		4	BS47-03	2003	Germany	Baden-Wuerttemberg	Fetus (abortion)	4	cfv	T-T-C-T-A-C-A-C-C-A-G	+	BW	SRR21927882	This study
		5	BS57-03	2003	Germany	Baden-Wuerttemberg	Bull prepuce	4	cfv	T-T-C-T-A-C-A-C-C-A-G	+	BW	SRR21927871	This study
		6	BS99-03	2003	Germany	Baden-Wuerttemberg	Cow placenta (Abortion)	4	cfv	T-T-C-T-A-C-A-C-C-A-G	+	BW	SRR21927860	This study
		7	BS101-03	2003	Germany	Baden-Wuerttemberg	Bull prepuce	4	cfv	T-T-C-T-A-C-A-C-C-A-G	+	BW	SRR21927852	This study
		8	BS105-03	2003	Germany	Baden-Wuerttemberg	Bull prepuce	4	cfv	T-T-C-T-A-C-A-C-C-A-G	+	BW	SRR21927851	This study
		9	BS109-03	2003	Germany	Baden-Wuerttemberg	Cow vaginae	4	cfv	T-T-C-T-A-C-A-C-C-A-G	+	BW	SRR21927850	This study
		10	BS51-01	2001	Germany	Baden-Wuerttemberg	Artificial vagina	4	cfv	T-T-C-T-A-C-A-C-C-A-G	+	BW	SRR21927849	This study
		11	BS52-01	2001	Germany	Baden-Wuerttemberg	Artificial vagina	4	cfv	T-T-C-T-A-C-A-C-C-A-G	+	BW	SRR21927903	This study
		12	BS135-02	2002	Germany	Baden-Wuerttemberg		4	cfv	T-T-C-T-A-C-A-C-C-A-G	+	BW	SRR21927902	This study
		13	BS201-02	2002	Germany	Baden-Wuerttemberg	Bull prepuce	4	cfv	T-T-C-T-A-C-A-C-C-A-G	+	BW	ERS686632	Irola et al., 2017
		14	BS111-03	2003	Germany	Baden-Wuerttemberg	Cow vaginae	4	cfv	T-T-C-T-A-C-A-C-C-A-G	+	BW	SRR21927901	This study
		15	BS84-04	2004	Germany	Baden-Wuerttemberg	Fetus (abortion)	4	cfv	T-T-C-T-A-C-A-C-C-A-G	+	LS	SRR21927900	This study
		16	BS89-04	2004	Germany	Baden-Wuerttemberg	Fetus (abortion) - 21.04.2004	-	cfv	T-T-C-T-A-C-A-C-C-A-G	+	TH-2	SRR21927899	This study
		17	BS38-06	2006	Germany	Baden-Wuerttemberg	Fetus (abortion)	4	cfv	T-T-C-T-A-C-A-C-C-A-G	+	BW	ERS686634	Irola et al., 2017
		18	14CS0001	unknown	Germany	Baden-Wuerttemberg	Bull prepuce	4	cfv	T-T-C-T-A-C-A-C-C-A-G	+	BW	ERS686641	Irola et al., 2017
		19	BS147-00	unknown	Germany	Baden-Wuerttemberg	Artificial vagina	4	cfv	T-T-C-T-A-C-A-C-C-A-G	+	BW	SRR21927898	This study
		20	BS149-00	unknown	Germany	Baden-Wuerttemberg	Artificial vagina	4	cfv	T-T-C-T-A-C-A-C-C-A-G	+	BW	SRR21927897	This study
		21	BS09-04	2004	Germany	Bayern	Fetus (abortion)	4	cfv	T-T-C-T-A-C-A-C-C-A-G	+	BA	SRR21927896	This study
		22	BS76-04	2004	Germany	Bayern	Fetus (abortion)	4	cfv	T-T-C-T-A-C-A-C-C-A-G	+	BA	ERS686633	Irola et al., 2017
		23	BS136-04	2004	Germany	Bayern	Bull prepuce	4	cfv	T-T-C-T-A-C-A-C-C-A-G	+	BA	SRR21927895	This study
		24	BS149-04	2004	Germany	Bayern	Bull prepuce	4	cfv	T-T-C-T-A-C-A-C-C-A-G	+	BA	SRR21927894	This study
		25	BS11-05	2005	Germany	Bayern	Bull prepuce	4	cfv	T-T-C-T-A-C-A-C-C-A-G	+	BA	SRR21927892	This study
		26	BS62-05	2005	Germany	Bayern	Bull prepuce	4	cfv	T-T-C-T-A-C-A-C-C-A-G	+	BA	SRR21927891	This study
		27	BS63-05	2005	Germany	Bayern	Bull prepuce	4	cfv	T-T-C-T-A-C-A-C-C-A-G	+	BA	SRR21927890	This study
		28	BS64-05	2005	Germany	Bayern	Bull prepuce	4	cfv	T-T-C-T-A-C-A-C-C-A-G	+	BA	SRR21927889	This study
		29	BS68-05	2005	Germany	Bayern	Bull prepuce	4	cfv	T-T-C-T-A-C-A-C-C-A-G	+	BA	SRR21927888	This study
		30	BS69-05	2005	Germany	Bayern	Bull prepuce	4	cfv	T-T-C-T-A-C-A-C-C-A-G	+	BA	SRR21927887	This study
		31	BS70-05	2005	Germany	Bayern	Bull prepuce	4	cfv	T-T-C-T-A-C-A-C-C-A-G	+	BA	SRR21927886	This study
		32	BS71-05	2005	Germany	Bayern	Bull prepuce	4	cfv	T-T-C-T-A-C-A-C-C-A-G	+	BA	SRR21927885	This study
		33	BS134-05	2005	Germany	Bayern	Fetus (abortion)	4	cfv	T-T-C-T-A-C-A-C-C-A-G	+	BW	SRR21927884	This study
		34	BS01-06	2006	Germany	Bayern	Bull prepuce	4	cfv	T-T-C-T-A-C-A-C-C-A-G	+	BW	SRR21927883	This study
		35	BS67-06	2006	Germany	Bayern	Bull prepuce	4	cfv	T-T-C-T-A-C-A-C-C-A-G	+	BA	SRR21927881	This study
		36	BS68-06	2006	Germany	Bayern	Bull prepuce	4	cfv	T-T-C-T-A-C-A-C-C-A-G	+	BA	SRR21927880	This study
		37	07BS0002	2007	Germany	Bayern	Fetus (abortion)	4	cfv	T-T-C-T-A-C-A-C-C-A-G	+	BA	SRR21927879	This study
		38	07BS0020	2007	Germany	Bayern	Bull prepuce	4	cfv	T-T-C-T-A-C-A-C-C-A-G	+	LS	ERS686635	Irola et al., 2017
		39	08CS0029	2008	Germany	Bayern	Bull prepuce	4	cfv	T-T-C-T-A-C-A-C-C-A-G	+	BA	SRR21927878	This study
		40	15CS0204	2015	Germany	Bayern	Bull prepuce	75	cfv	T-T-C-T-A-C-A-C-C-A-G	+	BW	SRR21927877	This study
		41	BS206-02	unknown	Germany	Bayern	Bull prepuce	4	cfv	T-T-C-T-A-C-A-C-C-A-G	+	BA	SRR21927876	This study
		42	13CS0183	2013	Germany	Brandenburg	Bull penis	4	cfv	T-T-C-T-A-C-A-C-C-A-G	+	LS	ERS686640	Irola et al., 2017
		43	13CS0131	2013	Germany	Brandenburg	Bull prepuce	4	cfv	T-T-C-T-A-C-A-C-C-A-G	+	LS	SRR21927875	This study
		44	09CS0018	2009	Germany	Lower Saxony	Bull prepuce	4	cfv	T-T-C-T-A-C-A-C-C-A-G	+	LS	SRR21927874	This study
		45	09CS0029	2009	Germany	Lower Saxony	Bull prepuce	4	cfv	T-T-C-T-A-C-A-C-C-A-G	+	LS	SRR21927873	This study
		46	09CS0030	2009	Germany	Lower Saxony	Bull prepuce	4	cfv	T-T-C-T-A-C-A-C-C-A-G	+	LS	SRR21927872	This study
		47	09CS0031	2009	Germany	Lower Saxony	Bull prepuce	4	cfv	T-T-C-T-A-C-A-C-C-A-G	+	LS	SRR21927870	This study
		48	09CS0032	2009	Germany	Lower Saxony	Bull prepuce	4	cfv	T-T-C-T-A-C-A-C-C-A-G	+	LS	SRR21927869	This study
		49	09CS0074	2009	Germany	Lower Saxony	Bull prepuce	4	cfv	T-T-C-T-A-C-A-C-C-A-G	+	LS	SRR21927868	This study
		50	11CS0190	unknown	Germany	Lower Saxony	Bull prepuce	4	cfv	T-T-C-T-A-C-A-C-C-A-G	+	LS	SRR21927867	This study
		51	11CS0191	unknown	Germany	Lower Saxony	Bull prepuce	4	cfv	T-T-C-T-A-C-A-C-C-A-G	+	LS	SRR21927866	This study
		52	06BS0114	unknown	Germany	Lower Saxony	Cow vaginae	4	cfv	T-T-C-T-A-C-A-C-C-A-G	+	LS	SRR21927865	This study
		53	14CS0123	unknown	Germany	Lower Saxony	Bull prepuce	4	cfv	T-T-C-T-A-C-A-C-C-A-G	+	LS	SRR21927864	This study
		54	14CS0124	unknown	Germany	Lower Saxony	Bull prepuce	4	cfv	T-T-C-T-A-C-A-C-C-A-G	+	LS	SRR21927863	This study
		55	BS210-99	1985	Germany	Thuringia	Fetus (abortion)	4	cfv	T-T-C-T-A-C-A-C-C-A-G	+	TH-1	SRR21927862	This study
		56	BS211-99	1987	Germany	Thuringia	Fetus (abortion)	4	cfv	T-T-C-T-A-C-A-C-C-A-G	+	TH-1	SRR21927861	This study
		57	BS208-99	1988	Germany	Thuringia	Fetus (abortion)	4	cfv	T-T-C-T-A-C-A-C-C-A-G	+	TH-1	SRR21927859	This study
		58	BS209-99	1988	Germany	Thuringia	Fetus (abortion)	4	cfv	T-T-C-T-A-C-A-C-C-A-G	+	TH-1	SRR21927858	This study
		59	BS212-99	1988	Germany	Thuringia	Fetus (abortion)	4	cfv	T-T-C-T-A-C-A-C-C-A-G	+	TH-1	SRR21927857	This study
		60	BS327-99	1993	Germany	Thuringia	Bull prepuce	4	cfv	T-T-C-T-A-C-A-C-C-A-G	+	TH-1	SRR21927856	This study
		61	BS74-04	2004	Germany	Thuringia	Bull sperm - 30.03.2004	4	cfv	T-T-C-T-A-C-A-C-C-A-G	+	TH-2	SRR21927855	This study
		62	BS75-04	2004	Germany	Thuringia	Bull prepuce - 30.03.2004	4	cfv	T-T-C-T-A-C-A-C-C-A-G	+	TH-2	SRR21927854	This study
		63	BS85-04	2004	Germany	Thuringia	Bull prepuce - 14.04.2004	4	cfv	T-T-C-T-A-C-A-C-C-A-G	+	TH-2	SRR21927853	This study
			* Markers as reported by Abdel-Glil et al., (2020).
